# Supplementary material
Source: publisher figshare collection journal article supplement (https://wiley.figshare.com/ndownloader/files/5636019)
Supplement: Supplementary file 1 [file 5636019]

TABLE A1. Parameters used in the model, their definitions, Bayesian model structure, prior assumptions, means, 95% highest posterior density intervals, plant species used, and data sources. All Gamma distributions are parameterized with shape and rate parameters. All other distributions use standard parameterizations. Species abbreviations are: *Avena fatua* (AVFA), *Bromus hordeaceus* (BRHO), *Avena barbata* (AVBA), *Vulpia myuros* (VUMY), *Stipa pulchra* (STPU), *Bromus diandrus* (BRDI), *Elymus glaucus* (ELGL), *Hordeum brachyantherum ssp. brachyantherum* (HOBR), *Melica californica* (MECA), *Stipa cernua* (STCE), and *Poa secunda ssp. secunda* (POSE).

| <i>Parameter</i> | <i>Definition</i>                                                       | <i>Formulas</i>                                                                                                                                                                                                                                           | <i>Priors</i>                                                                                                                                                                                                       | <i>Mean<br/>(95% HPD<br/>Interval)</i> | <i>Plant<br/>species</i> | <i>Data<br/>sources</i>     |
|------------------|-------------------------------------------------------------------------|-----------------------------------------------------------------------------------------------------------------------------------------------------------------------------------------------------------------------------------------------------------|---------------------------------------------------------------------------------------------------------------------------------------------------------------------------------------------------------------------|----------------------------------------|--------------------------|-----------------------------|
| $g_a$            | fraction of annual seeds that germinate and survive the spring          | $Y \sim \text{Beta-Binomial}(a, b, n)$ , where $Y$ is the number of surviving germinants and $n$ is the initial number of seeds                                                                                                                           | <i>Uninformative:</i><br>$a, b \sim \text{Gamma}(1.001, 0.001)$<br><i>Informative:</i><br>$a, b \sim \text{Gamma}(1, 1)$                                                                                            | 0.45<br>(0.22, 0.67)                   | AVFA, BRHO, AVBA, VUMY   | (1, 2)                      |
| $g_s$            | fraction of perennial seeds that germinate and survive the spring       | $Y \sim \text{Beta-Binomial}(a, b, n)$ , where $Y$ is the number of surviving germinants and $n$ is the initial number of seeds                                                                                                                           | <i>Uninformative:</i><br>$a, b \sim \text{Gamma}(1.001, 0.001)$<br><i>Informative:</i><br>$a, b \sim \text{Gamma}(1, 1)$                                                                                            | 0.34<br>(0.14, 0.54)                   | STPU                     | (3, 4)                      |
| $s_p$            | fraction of perennial adults that survive the summer                    | $Y \sim \text{Beta-Binomial}(a, b, n)$ , where $Y$ is the number of surviving germinants and $n$ is the initial number of adults                                                                                                                          | <i>Uninformative:</i><br>$a, b \sim \text{Gamma}(1.001, 0.001)$<br><i>Informative:</i><br>$a \sim \text{Gamma}(8, 1)$<br>$b \sim \text{Gamma}(0.01, 1)$                                                             | 0.88<br>(0.84, 0.93)                   | STPU                     | (5–8)                       |
| $\lambda_a$      | per-capita seed production in the absence of competition for the annual | $\text{mean} = \lambda_a / (1 + \alpha_{aa}x_a + \alpha_{ap}x_p)$ ,<br>$Y \sim \text{Normal}(\log(\text{mean}), \sigma = 1/\tau)$ , where $Y$ is the number of seeds per individual and $x_a$ and $x_p$ are the densities of annuals and perennial adults | <i>Uninformative:</i><br>$\lambda_a \sim \text{Uniform}(0, 600)$<br>$\tau \sim \text{Gamma}(0.001, 0.001)$<br><i>Informative:</i><br>$\lambda_a \sim \text{Gamma}(30, 1)$<br>$\tau \sim \text{Gamma}(0.001, 0.001)$ | 29<br>(23, 37)                         | AVFA, BRDI               | (9, Molinari et al. unpub.) |

| <i>Parameter</i> | <i>Definition</i>                                               | <i>Formulas</i>                 | <i>Priors</i>                                                                                                                   | <i>Mean<br/>(95% HPD<br/>Interval)</i> | <i>Plant<br/>species</i> | <i>Data<br/>sources</i>              |
|------------------|-----------------------------------------------------------------|---------------------------------|---------------------------------------------------------------------------------------------------------------------------------|----------------------------------------|--------------------------|--------------------------------------|
| $\alpha_{aa}$    | per-capita<br>competitive<br>effect of<br>annuals on<br>annuals | fitted with $\lambda_a$ , above | <i>Uninformative:</i><br>$\alpha_{aa} \sim \text{Gamma}(1, 10)$<br><i>Informative:</i><br>$\alpha_{aa} \sim \text{Gamma}(1, 9)$ | 1.74E-03<br>(2.86E-04,<br>3.13E-03)    | AVFA,<br>BRDI            | (9,<br>Molinari<br>et al.<br>unpub.) |

Table A1 continued

| <i>Parameter</i> | <i>Definition</i>                                                          | <i>Formulas</i>                                                                                                                                                                                                                                | <i>Priors</i>                                                                                                                                                                                                        | <i>Mean<br/>(95% HPD<br/>Interval)</i> | <i>Plant<br/>species</i> | <i>Data<br/>sources</i>   |
|------------------|----------------------------------------------------------------------------|------------------------------------------------------------------------------------------------------------------------------------------------------------------------------------------------------------------------------------------------|----------------------------------------------------------------------------------------------------------------------------------------------------------------------------------------------------------------------|----------------------------------------|--------------------------|---------------------------|
| $\alpha_{ap}$    | per-capita competitive effect of perennial adults on annuals               | fitted with $\lambda_a$ , above                                                                                                                                                                                                                | <i>Uninformative:</i><br>$\alpha_{ap} \sim \text{Gamma}(1, 10)$<br><i>Informative:</i><br>$\alpha_{ap} \sim \text{Gamma}(1, 9)$                                                                                      | 2.41E-02<br>(9.73E-06, 6.76E-02)       | AVFA, BRDI, STPU         | (Molinar i et al. unpub.) |
| $\lambda_p$      | per-capita seed production in the absence of competition for the perennial | $mean = \lambda_p / (1 + \alpha_{pa}x_a + \alpha_{pp}x_p)$ ,<br>$Y \sim \text{Normal}(\log(mean), \sigma = 1/\tau)$ ,<br>where $Y$ is the number of seeds per individual and $x_a$ and $x_p$ are the densities of annuals and perennial adults | <i>Uninformative:</i><br>$\lambda_p \sim \text{Uniform}(0, 600)$<br>$\tau \sim \text{Gamma}(0.001, 0.001)$<br><i>Informative:</i><br>$\lambda_p \sim \text{Gamma}(200, 1)$<br>$\tau \sim \text{Gamma}(0.001, 0.001)$ | 201<br>(173, 229)                      | STPU                     | (Molinar i et al. unpub)  |
| $\alpha_{pa}$    | per-capita competitive effect of annuals on perennial adults               | fitted with $\lambda_p$ , above                                                                                                                                                                                                                | <i>Uninformative:</i><br>$\alpha_{pa} \sim \text{Gamma}(1, 10)$<br><i>Informative:</i><br>$\alpha_{pa} \sim \text{Gamma}(1, 9)$                                                                                      | 1.38E-02<br>(1.77E-05, 3.62E-02)       | STPU, BRDI               | (Molinar i et al. unpub)  |
| $\alpha_{pp}$    | per-capita competitive effect of perennial adults on perennial adults      | fitted with $\lambda_p$ , above                                                                                                                                                                                                                | <i>Uninformative:</i><br>$\alpha_{pp} \sim \text{Gamma}(1, 10)$<br><i>Informative:</i><br>$\alpha_{pp} \sim \text{Gamma}(1, 9)$                                                                                      | 1.53E-01<br>(2.56E-04, 3.45E-01)       | STPU                     | (Molinar i et al. unpub)  |

Table A1 continued

| <i>Parameter</i> | <i>Definition</i>                                                           | <i>Formulas</i>                                                                                                                                                                                                                                                                                                     | <i>Priors</i>                                                                                                                                                              | <i>Mean<br/>(95% HPD<br/>Interval)</i> | <i>Plant<br/>species</i>                                   | <i>Data<br/>sources</i> |
|------------------|-----------------------------------------------------------------------------|---------------------------------------------------------------------------------------------------------------------------------------------------------------------------------------------------------------------------------------------------------------------------------------------------------------------|----------------------------------------------------------------------------------------------------------------------------------------------------------------------------|----------------------------------------|------------------------------------------------------------|-------------------------|
| $s_s$            | perennial seedling summer survival                                          | $mean = s_s / (1 + \alpha_{sa}x_a + \alpha_{ss}x_s + \alpha_{sp}x_p)$ $Y \sim \text{Beta-Binomial}(a, a(1 - mean)/mean, x_s),$ where $Y$ is the number of surviving seedlings after the summer, and $x_a$ , $x_s$ , and $x_p$ are the densities of annuals, perennial seedlings, and perennial adults in the spring | <i>Uninformative:</i><br>$s_s \sim \text{Beta}(1, 1)$<br>$a \sim \text{Gamma}(1, 1)$<br><i>Informative:</i><br>$s_s \sim \text{Beta}(1, 9)$<br>$a \sim \text{Gamma}(1, 1)$ | 0.29<br>(0.18, 0.41)                   | STPU,<br>ELGL,<br>HOBR,<br>MECA,<br>STCE,<br>POSE          | (3, 4, 8,<br>11, 12)    |
| $\alpha_{sa}$    | per-capita competitive effect of annuals on perennial seedlings             | fitted with $s_s$ , above                                                                                                                                                                                                                                                                                           | <i>Uninformative:</i><br>$\alpha_{sa} \sim \text{Gamma}(1, 10)$<br><i>Informative:</i><br>$\alpha_{sa} \sim \text{Gamma}(1, 9)$                                            | 2.84E-03<br>(1.75E-06,<br>8.16E-03)    | STPU,<br>ELGL,<br>HOBR,<br>MECA,<br>STCE,<br>POSE,<br>VUMY | (3, 4, 8,<br>11, 12)    |
| $\alpha_{ss}$    | per-capita competitive effect of perennial seedlings on perennial seedlings | fitted with $s_s$ , above                                                                                                                                                                                                                                                                                           | <i>Uninformative:</i><br>$\alpha_{ss} \sim \text{Gamma}(1, 10)$<br><i>Informative:</i><br>$\alpha_{ss} \sim \text{Gamma}(1, 9)$                                            | 8.74E-02<br>(3.16E-05,<br>2.41E-01)    | STPU,<br>ELGL,<br>HOBR,<br>MECA,<br>STCE,<br>POSE          | (3, 4, 8,<br>11, 12)    |

Table A1 continued

| <i>Parameter</i>           | <i>Definition</i>                                                                     | <i>Formulas</i>                                                                                          | <i>Priors</i>                                                                                                                   | <i>Mean<br/>(95% HPD<br/>Interval)</i> | <i>Plant<br/>species</i>           | <i>Data<br/>sources</i> |
|----------------------------|---------------------------------------------------------------------------------------|----------------------------------------------------------------------------------------------------------|---------------------------------------------------------------------------------------------------------------------------------|----------------------------------------|------------------------------------|-------------------------|
| $\alpha_{sp}$              | per-capita competitive effect of perennial adults on perennial seedlings              | fitted with $s_s$ , above                                                                                | <i>Uninformative:</i><br>$\alpha_{sp} \sim \text{Gamma}(1, 10)$<br><i>Informative:</i><br>$\alpha_{sp} \sim \text{Gamma}(1, 9)$ | 1.26E-01<br>(4.94E-05, 3.64E-01)       | STPU, ELGL, HOBR, MECA, STCE, POSE | (3, 4, 8, 11, 12)       |
| $\alpha_{as}, \alpha_{ps}$ | per-capita competitive effects of perennial seedlings on annuals and perennial adults | $\alpha_{as} = \phi \alpha_{aa}$<br>$\alpha_{ps} = \phi \alpha_{pa}$<br>$\phi \sim \text{Uniform}(0, 1)$ |                                                                                                                                 | 0.50<br>(0.02, 0.97)                   |                                    |                         |

## LITERATURE CITED

1. Hamilton, JG, Holzapfel C, Mahall BE (1999) Coexistence and interference between a native perennial grass and non-native annual grasses in California. *Oecologia* 121(4):518–526.
2. Wainwright, CE, Wolkovich EM, Cleland EE (2012) Seasonal priority effects: implications for invasion and restoration in a semi-arid system. *J Appl Ecol* 49(1):234–241.
3. Dyer, AR, Fossum HC, Menke JW (1996) Emergence and survival of *Nassella pulchra* in a California grassland. *Madrono USA* 43:316–333.
4. Buisson, E, et al. (2008) Reintroduction of *Nassella pulchra* to California coastal grasslands: Effects of topsoil removal, plant neighbour removal and grazing. *Appl Veg Sci* 11(2):195–204.
5. Dyer, AR (2003) Burning and grazing management in a California grassland: Growth, mortality, and recruitment of *Nassella pulchra*. *Restor Ecol* 11(3):291–296.
6. Corbin, JD, D’Antonio CM (2004) Competition between native perennial and exotic annual grasses: Implications for an historical invasion. *Ecology* 85(5):1273–1283.
7. Malmstrom, C, Hughes C, Newton L, Stoner C (2005) Virus infection in remnant native bunchgrasses from invaded California grasslands. *New Phytol* 168(1):217–230.
8. Stahlheber, KA, D’Antonio CM (2014) Do tree canopies enhance perennial grass restoration in California oak savannas? *Restor Ecol* 22(5):574–581.
9. Wille, MJ, Thill DC, Price WJ (1998) Wild Oat (*Avena fatua*) Seed Production in Spring Barley (*Hordeum vulgare*) Is Affected by the Interaction of Wild Oat Density and Herbicide Rate. *Weed Sci* 46(3):336–343.
10. Dyer, A, Rice K (1997) Intraspecific and diffuse competition: The response of *Nassella pulchra* in a California grassland. *Ecol Appl* 7(2):484–492.
11. Brown, C, Rice K (2000) The Mark of Zorro: Effects of the Exotic Annual Grass *Vulpia myuros* on California Native Perennial Grasses. *Restor Ecol* 8(1):10–17.

12. Seabloom, EW (2011) Spatial and temporal variability in propagule limitation of California native grasses. *Oikos* 120(2):291–301.
